# Supplementary material for: (001)-TiO2 nanosheets loaded on BiOI improve carrier separation and enhance the photocatalytic activity
Source: Royal Society of Chemistry journal article supplement (doi:10.1039/d3nj02559d), 2023-01-01
Supplement: d3nj02559d1.pdf [file d3nj02559d1.pdf]

## *Supplementary material*

### **(001)-TiO<sub>2</sub> nanosheets loaded on BiOI improve carrier separation and enhance the photocatalytic activity**

Xin Mai <sup>a</sup>, Ran Gao <sup>a</sup>, Yeheng Zhang <sup>a</sup>, Junnan Chen <sup>a</sup>, Wensong Lin\* <sup>a</sup>, and Chengli  
Mai <sup>b</sup>

<sup>a</sup> School of Materials Engineering, Shanghai University of Engineering Science, Shanghai, China;

<sup>b</sup> Shanxi Normal University, Shanxi, China; E-mail: maichengli@163.com;

\* corresponding author: Wensong Lin, [wslin@sues.edu.cn](mailto:wslin@sues.edu.cn), ORCID:0000-0001-7187-6489

This supporting information contains the following information:

**Fig. S1** TIC images of RhB after degradation reaction.

**Table. S1** Summary of the results for various photocatalysts based on TiO<sub>2</sub> for  
degradations of RhB.

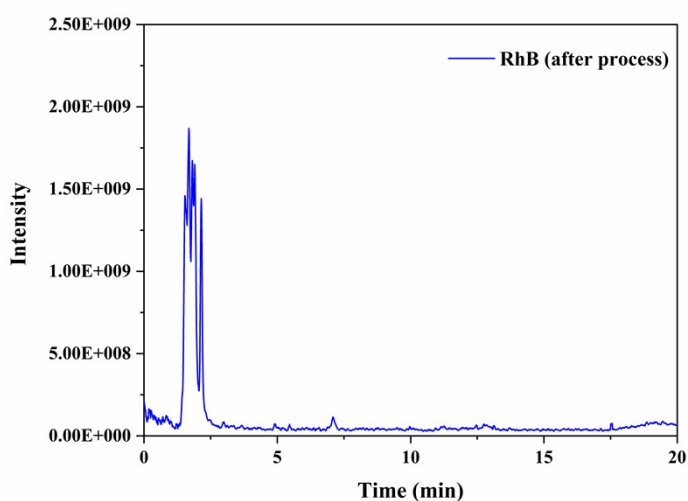

Fig. S1 TIC images of RhB after degradation reaction.

**Table. S1**

Summary of the results for various photocatalysts based on TiO<sub>2</sub> for degradations of RhB.

| Photocatalyst                                                    | Light source  | Experimental conditions                           | Degradation efficiency | Ref.      |
|------------------------------------------------------------------|---------------|---------------------------------------------------|------------------------|-----------|
| (001)-TiO <sub>2</sub> /BiOI                                     | 300W Xe-lamp  | Catalyst = 50 mg<br>[RhB] = 10 mg L <sup>-1</sup> | 95% in 60 min          | This work |
| Ag@AgI/TiO <sub>2</sub>                                          | Xe 1000 W     | Catalyst = 50 mg<br>[RhB] = 10 mg l               | 91% in 90 min          | [S1]      |
| Fe <sub>2</sub> O <sub>3</sub> /TiO <sub>2</sub> /Graphene oxide | Wolfram 300 W | Catalyst = 20 mg<br>[RhB] = 10 mg l               | 92.98% in 80 min       | [S2]      |
| TiO <sub>2</sub> NTs/BiOI                                        | 500W Xe-lamp  | Catalyst = 50 mg<br>[RhB] = 10 mg L <sup>-1</sup> | 62% in 180 min         | [S3]      |
| Bi/Bi <sub>2</sub> MoO <sub>6</sub> /TiO <sub>2</sub> NTs        | 500W Xe-lamp  | Catalyst = 20 mg<br>[RhB] = 10 mg L <sup>-1</sup> | 73.21% in 120 min      | [S4]      |

## References

- S1. W. Liu, C. Wei, G. Wang, X. Cao, Y. Tan and S. Hu, *Ceramics International*, 2019, **45**, 17884-17889.
- S2. Y. P. Putra, S. Wahyuningsih, A. H. Ramelan and R. Hidayat, *Materials Research Express*, 2019, **6**.
- S3. Z. Liu, Q. Wang, X. Tan, Y. Wang, R. Jin and S. Gao, *Separation and Purification Technology*, 2019, **215**, 565-572.
- S4. D. Cao, Q. Wang, Y. Wu, S. Zhu, Y. Jia and R. Wang, *Separation and Purification Technology*, 2020, **250**.
